# Supplementary material for: FOXE1 regulates migration and invasion in thyroid cancer cells and targets ZEB1
Source: PubMed Central journal article supplement (PMC6993207; doi:10.1530/erc-19-0156), 2019-12-16
Supplement: supplementary_figure_1.pdf [file supplementary_figure_1.pdf]

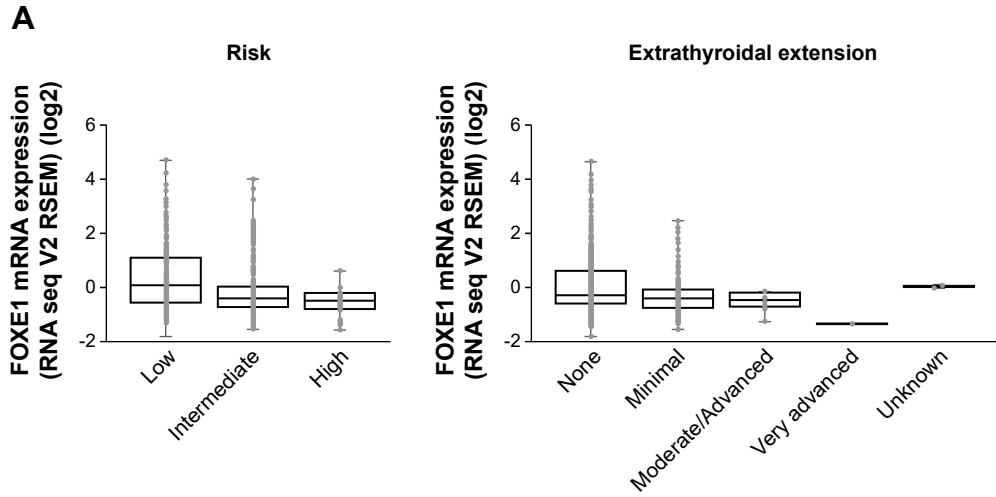

**B**

| Study | ID        | adj.P.Val | P.Value  | t     | B    | logFC |
|-------|-----------|-----------|----------|-------|------|-------|
| 1     | 206912_at | 1.39E-19  | 5.71E-22 | -15.4 | 39.8 | -5.43 |
| 2     | 206912_at | 3.08E-06  | 2.46E-08 | -7.9  | 9.26 | -5.38 |

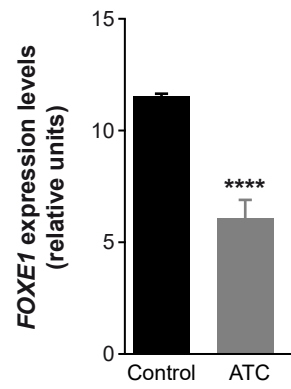

<sup>1</sup>Thyroid vs ATC  
N= 45 vs 11

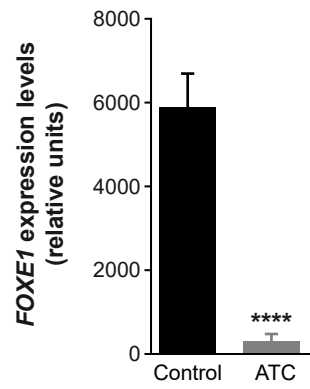

<sup>2</sup>Thyroid vs ATC  
N= 13 vs 12
