# Supplementary material for: FOXE1 regulates migration and invasion in thyroid cancer cells and targets ZEB1
Source: PubMed Central journal article supplement (PMC6993207; doi:10.1530/erc-19-0156), 2019-12-16
Supplement: supplementary_figure_2.pdf [file supplementary_figure_2.pdf]

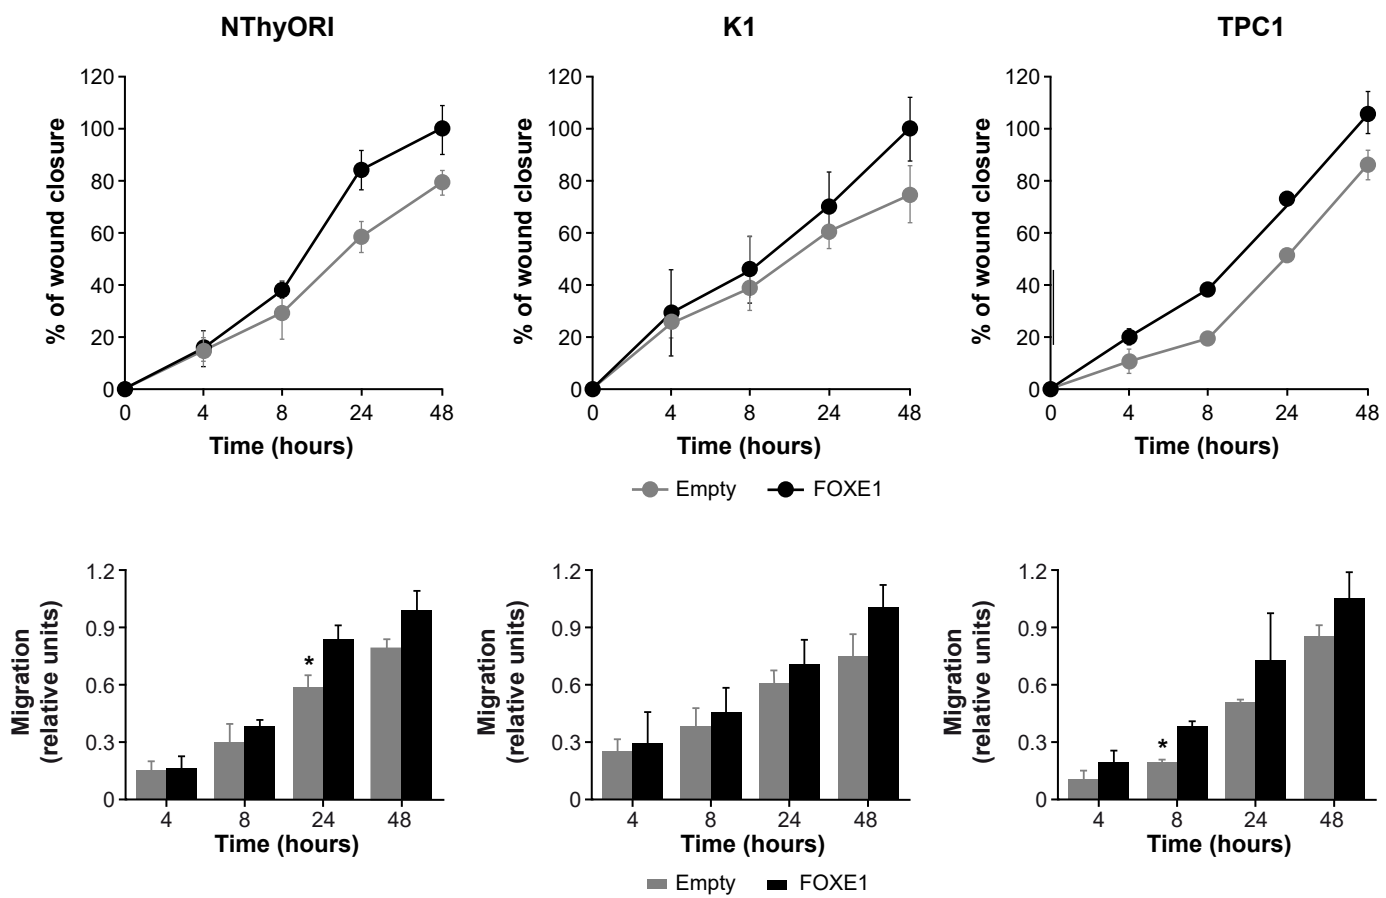

Figure Supp. 2
