# Supplementary material for: FOXE1 regulates migration and invasion in thyroid cancer cells and targets ZEB1
Source: PubMed Central journal article supplement (PMC6993207; doi:10.1530/erc-19-0156), 2019-12-16
Supplement: supplementary_table_1.pdf [file supplementary_table_1.pdf]

**Supplementary Table 1.** Primers used for determination on gene expression levels

| Gene         | Specie | Oligonucleotide Sequence |                          |
|--------------|--------|--------------------------|--------------------------|
|              |        | Forward                  | Reverse                  |
| <i>FoxE1</i> | Rat    | TCATCACCGAGCGCTTCCCGTT   | GCGGCTGCATCGTGCATGTA     |
| <i>Cdh1</i>  | Rat    | GTTTGCTCGGCGTTTGCCCG     | ACAAAGCCACGAGGAGACCTGC   |
| <i>Cav</i>   | Rat    | TTGGCCTTCATTGCGGGTAT     | AGAGGAGAAGATGCGCCCTA     |
| <i>Dsp</i>   | Rat    | AGCATCCAGCGTCAGACAAA     | GGAGGGGCATGTTCTTGTC      |
| <i>Esr1</i>  | Rat    | GCGCAAGTGTTACGAAGTGG     | GGTTGGCAGCTCTCATGTCT     |
| <i>Il1rn</i> | Rat    | AAGCTGTGCCTGTCTTGTTGT    | TCTCGGAGCGGATGAAGGTA     |
| <i>Krt19</i> | Rat    | GACGCGGTGGAAGTTTTAGTG    | GCGGGCATTGTGCGATCTGTA    |
| <i>Zeb1</i>  | Rat    | GTGGATCCCCAGAGCGTTAC     | ACCGCTGAAGCAAAGAGGA      |
| <i>Mmp9</i>  | Rat    | TGGGATGTACGCATGTGACC     | TACAGATTCCGCACTCGTGG     |
| <i>Gus</i>   | Rat    | CATGACGAACCAGTCACCAC     | ACGGTCTGCTTCCCATACAC     |
| <i>GADPH</i> | Human  | GGTCTCCTCTGACTTCAACA     | GTGAGGGTCTCTCTTTCCT      |
| <i>FOXE1</i> | Human  | TGAGCCAGCGTAGGGACGAAAA   | CCACCTCCTCCCGTTTACAGAGTA |
| <i>ZEB1</i>  | Human  | GCCAATAAGCAAACGATTCTG    | TTTGGCTGGATCACTTTCAAG    |
| <i>CDH1</i>  | Human  | CAGCACGTACACAGCCCTAA     | ACCTGAGGCTTTGGATTTCCT    |
