# Supplementary material for: FOXE1 regulates migration and invasion in thyroid cancer cells and targets ZEB1
Source: PubMed Central journal article supplement (PMC6993207; doi:10.1530/erc-19-0156), 2019-12-16
Supplement: supplementary_table_2.pdf [file supplementary_table_2.pdf]

**Supplementary Table 2.** Oligos used for SNPs genotyping

| <b>Oligo Name</b>   | <b>Orientation</b> | <b>Sequence</b>                   |
|---------------------|--------------------|-----------------------------------|
| <i>rs965513</i>     | Forward            | AATGTAGGTTTTTGGTGATGGTATGG        |
|                     | Reverse            | GTGAGAACAGACTAATACATCTTCTTTTAAATT |
| <i>rs1867277</i>    | Forward            | CTTCAGCCGGAGACCAGAGT              |
|                     | Reverse            | CAGACAGAGGCTCGGGAGTG              |
| <i>Poly-A tract</i> | Forward            | CTCGGACCTCTCCACCTACC              |
|                     | Reverse            | GCGCGTAGCCTGCATAGAC               |
