# Supplementary material for: FOXE1 regulates migration and invasion in thyroid cancer cells and targets ZEB1
Source: PubMed Central journal article supplement (PMC6993207; doi:10.1530/erc-19-0156), 2019-12-16
Supplement: supplementary_table_3.pdf [file supplementary_table_3.pdf]

**Supplementary Table 3.** Oligos used for ChIP analysis

| <b>Oligo Name</b> | <b>Orientation</b> | <b>Sequence</b>       |
|-------------------|--------------------|-----------------------|
| <i>Zeb1</i>       | Forward            | CTGGCAGCAGTCCTTTCCTT  |
|                   | Reverse            | TCCCTTGAACAATGCTGCCA  |
| <i>Tpo</i>        | Forward            | AGCAAGGACACACAAGCACTT |
|                   | Reverse            | CTCCACTGAAGAAGCAGGCTG |
| <i>2 kb Cis</i>   | Forward            | GAGGAGAGGGTTATGGCTGC  |
|                   | Reverse            | TCCCCTTGGCATTTCAGTCAG |
| <i>2.5 kb Cis</i> | Forward            | GACAGGAGGTGTCAGGTGTG  |
|                   | Reverse            | GAGCCCATTTCCTCAACA    |
